# **Syndemic violence victimization, alcohol and drug use, and HIV transmission risk behavior among transgender women in India: A cross-sectional, population-based study**

Venkatesan Chakrapani<sup>1,2</sup>, P.V.M. Lakshmi<sup>2</sup>, Peter A. Newman<sup>3\*</sup>, Jasvir Kaur<sup>2</sup>, Alexander C. Tsai<sup>4</sup>, P.P. Vijin<sup>2</sup>, Bhawani Singh<sup>5</sup>, Pradeep Kumar<sup>5</sup>, Shobini Rajan<sup>5</sup>, Rajesh Kumar<sup>2</sup>

<sup>1</sup> Centre for Sexuality and Health Research and Policy (C-SHaRP), Chennai, India

<sup>2</sup> Postgraduate Institute of Medical Education and Research (PGIMER), School of Public Health, Chandigarh, India

<sup>3</sup> University of Toronto, Factor-Inwentash Faculty of Social Work, Toronto, Canada

<sup>4</sup> Massachusetts General Hospital and Harvard Medical School, Boston, United States

<sup>5</sup> National AIDS Control Organisation, New Delhi, India

\* Corresponding author:

Email: [p.newman@utoronto.ca](mailto:p.newman@utoronto.ca)

**NOTE: This preprint reports new research that has not been certified by peer review and should not be used to guide clinical practice.**

## 1 **Abstract**

2 **Introduction:** Transgender women are disproportionately burdened by HIV. Co-occurring  
3 epidemics of adverse psychosocial exposures accelerate HIV sexual risk, including among  
4 transgender women; however, studies using additive models fail to examine synergies among  
5 psychosocial conditions that define a syndemic. We examined the impact of synergistic  
6 interactions among 4 psychosocial exposures on condomless anal sex (CAS) among a  
7 national probability sample of transgender women in India.

8 **Methods:** A probability-based sample of 4,607 HIV-negative transgender women completed  
9 the Indian Integrated Bio-behavioral Surveillance survey, 2014–2015. We used linear  
10 probability regression and logistic regression to assess 2-, 3-, and 4-way interactions among 4  
11 exposures (physical and sexual violence, drug and alcohol use) on CAS.

12 **Results:** Overall, 27.3% reported physical and 22.3% sexual violence victimization (39.2%  
13 either physical or sexual violence), one-third (33.9%) reported frequent alcohol use and 11.5%  
14 illicit drug use. Physical violence was associated with twofold higher odds of CAS in the main  
15 effects model. Significant two- and three-way interactions were identified on both  
16 multiplicative and additive scales between physical violence and drug use; physical and sexual  
17 violence; physical violence, sexual violence, and alcohol use; and physical violence, alcohol  
18 and drug use.

19 **Conclusions:** Physical and sexual violence victimization, and alcohol and drug use are highly  
20 prevalent and synergistically interact to increase CAS among transgender women in India.  
21 Targeted and integrated initiatives to improve assessment of psychosocial comorbidities, to  
22 combat transphobic violence, and to provide tailored, trauma-informed alcohol and substance  
23 use treatment services may reduce HIV risk among transgender women.

24 **Keywords:** syndemics, transfeminine people, HIV, syndemic theory, mental health, stigma

## 25 Introduction

26 Transgender women globally bear a disproportionate HIV burden [1] secondary to  
27 rampant stigma and discrimination in various domains of their lives [2]. India’s National AIDS  
28 Control Organization (NACO) designates transgender women a ‘high risk group’ or ‘key  
29 population’, with official HIV prevalence estimates ranging from 9.5% (in 2015 [3]) to 3.1%  
30 (in 2017 [4])—from 14 to over 40 times higher than the general population (0.22%) [5]. Until  
31 2006, NACO-supported HIV preventive interventions subsumed transgender women under  
32 “men who have sex with men”; but they are now reached through 41 interventions exclusively  
33 for transgender women and 152 ‘core-composite’ targeted HIV interventions for transgender  
34 women with other at-risk populations [5]. These targeted interventions focus on HIV and STI  
35 education, condom promotion, free condom distribution, and HIV testing referrals.  
36 Transgender women in India have demonstrated high (89%) awareness of the usefulness of  
37 condoms in preventing HIV infection; nevertheless, consistent condom use remains low at 45%  
38 to 54% [4,6].

39 Syndemic theory has been applied to explain the clustering and concentration of  
40 diseases such as HIV in vulnerable populations [7], including transgender women [1,8]. In their  
41 classic paper [9], Stall et al. highlighted the public health impacts of co-occurring psychosocial  
42 problems among gay men in the U.S., advancing a life-course theory of syndemic production  
43 rooted in the cultural marginalization of a population that is heavily stigmatized [10]. In the  
44 Indian context, harmful social conditions such as societal stigma faced by transgender women  
45 may lead to clustering of psychosocial health problems, such as violence victimization,  
46 problematic alcohol use, depression, and HIV risk [11,12]; these may mutually reinforce one  
47 another and synergistically amplify disease burden.

48 Transgender women in India have a high prevalence of psychosocial health problems,  
49 including lifetime physical or sexual violence victimization (84.0%), alcohol use (37.3%) and

50 depression (35.3%), all of which have demonstrated significant additive effects on HIV risk  
51 [13]. One study reported 18% past-year prevalence of sexual violence victimization, with  
52 higher risk for HIV among those who experienced sexual violence [14].

53 Exploring the presence of synergy among psychosocial health conditions requires the  
54 use of appropriate analytical strategies. A recommended analytical technique for testing  
55 synergy is by checking for statistical interaction (on the additive and/or multiplicative scale)  
56 between co-occurring conditions [15,16]. Most analyses in western literature that purportedly  
57 explored synergy used the number of psychosocial conditions or exposures as a cumulative  
58 count to predict HIV risk behavior, which does not address the interaction concept embedded  
59 in syndemic theory [15]. Two papers on syndemics among transgender women in India each  
60 used analytical strategies that did not involve testing for interactions between psychosocial  
61 conditions. One study used the number of psychosocial syndemic conditions as a cumulative  
62 count to predict HIV risk behavior [13]. Another study used latent class analysis to identify  
63 different ‘syndemic classes’ (combinations of depression, alcohol use, and/or violence  
64 victimization), which were associated with higher HIV risk compared to no syndemic class [6].

65 To address research gaps in the application of syndemic theory and support the design  
66 of tailored, evidence informed interventions, we assessed potential synergistic interactions  
67 between sexual and physical violence, alcohol use, and drug use on condomless anal sex (CAS)  
68 among transgender women.

69

## 70 **Materials and Methods**

### 71 **Study design and population**

72 Data for these analyses were drawn from a population-based cross-sectional survey  
73 among transgender women recruited under India’s National AIDS Control Organization

74 (NACO) Integrated Bio-Behavioral Surveillance (IBBS) study, last conducted from  
75 2014–2015. The IBBS aimed to generate evidence on risk behaviors among groups deemed  
76 high-risk (e.g., transgender women, female sex workers, men who have sex with men) to  
77 support planning and prioritization of HIV program efforts. Eligibility criteria were as follows:  
78 persons aged  $\geq 15$  years, whose self-identity does not conform unambiguously to conventional  
79 notions of male or female gender roles but combines or moves between them.

80 The IBBS study was approved by the ethics committees of NACO and participating  
81 Indian Council of Medical Research regional institutes. All participants provided written  
82 informed consent; for those 15-17 years-old, consent was also obtained from their  
83 parent/guardian. Monetary compensation of INR 200 (~3 USD) was provided.

84 This paper presents findings from secondary analysis of NACO population-based study  
85 data to examine the burden of adverse psychosocial exposures, co-occurrence of these  
86 exposures, and their potential independent and synergistic effects on CAS among transgender  
87 women.

88

## 89 **Sampling and recruitment**

90 The IBBS sample size was calculated with the primary objective to measure changes in  
91 consistent condom use with sexual partners and changes in HIV prevalence. The primary unit  
92 of survey was a ‘domain’: a geographical unit of either a single district or a group of four socio-  
93 culturally similar districts where a single district had an insufficient sample size. Sampling  
94 including both conventional cluster sampling (CCS)—in sites (e.g., homes, brothels) where  
95 transgender women could be found at any time of the day, and time-location cluster sampling  
96 (TLCS)—in sites such as parks and beaches where transgender women could be found on  
97 particular days and times to meet or socialize with other transgender people or potential male  
98 partners. The estimated sample size of transgender women for each domain was  $>700$ .

99 However, considering feasibility based on sample availability in different domains, a target  
100 sample size of 400 per domain was chosen. In domains with sample sizes <400, a ‘take all’  
101 approach was used. Overall, the target sample size was 5,588 transgender women in 15  
102 domains across 11 states. A valid sample of 4,966 transgender women was achieved, with an  
103 81% response rate. NACO’s online report [17] provides further details on sampling and  
104 recruitment.

105

## 106 **Measures**

107 Information on participants’ sociodemographic characteristics included age (in years),  
108 years of education, marital status, engagement in sex work (past year) and self-identified  
109 gender-affirmative surgical status (*ackwa*: pre- or non-operative, or *nirvan*: post-operative).  
110 Table 1 describes how the outcome, primary exposures, and other relevant covariates used in  
111 the analysis were measured—survey items, response range and scoring, and creation of binary  
112 and continuous measures. The binary outcome measure was CAS with any type (regular,  
113 paying, paid, and casual) of male sexual partner in the past month. Binary adverse psychosocial  
114 exposures included physical violence [PV], sexual violence [SV], and drug use [D] (non-  
115 injection or injection drugs) in the past year, and frequent alcohol use [A] (>3 days) in the past  
116 week (Table 1). Other covariates included engagement in sex work, forced sex experience  
117 during adolescence (<18 years), HIV transmission knowledge (score), HIV risk perception  
118 (high vs. low), social support (score), and HIV program exposure (score).

119 **Table 1. Summary of Key Measures: Outcome, Primary Exposures, and other Relevant Covariates**

| Measures                                                   | Survey items    |                                                                                                                                                                                                                               | Range of responses, coding, and scores                                                                                                                                                                                                            | Types of variables       |
|------------------------------------------------------------|-----------------|-------------------------------------------------------------------------------------------------------------------------------------------------------------------------------------------------------------------------------|---------------------------------------------------------------------------------------------------------------------------------------------------------------------------------------------------------------------------------------------------|--------------------------|
|                                                            | Number of items | Questions asked                                                                                                                                                                                                               |                                                                                                                                                                                                                                                   |                          |
| <b>Outcome</b>                                             |                 |                                                                                                                                                                                                                               |                                                                                                                                                                                                                                                   |                          |
| <i>Condomless anal sex with male partners (past month)</i> | 4               | In the last one month, how often have you used condoms when you had anal sex with your ...?<br>a. regular non-paying male partner<br>b. paying male partner<br>c. paid male partner<br>d. casual non-paying male partners     | 0 for 'every time' and 1 for all other options (most of the time, sometimes, never)<br><br>'Condomless anal sex' was created by combining the condom use (=1) responses from these four types of partners.                                        | Binary                   |
| <b>Primary exposures</b>                                   |                 |                                                                                                                                                                                                                               |                                                                                                                                                                                                                                                   |                          |
| <i>Physical violence (past year)</i>                       | 2               | In the last 12 months, how many times would you say someone has beaten (hurt, hit, slapped, pushed, kicked, punched, choked or burned) you?<br><br>In the last 12 months, who was the person (or people) who have beaten you? | 0 for 'never' and 1 for other responses (Once, 2-5 times, 6-10 times, >10 times).<br>Those who responded as "Do not remember" but reported the person who caused physical violence were also categorized as having experienced physical violence. | Binary                   |
| <i>Sexual violence (past year)</i>                         | 1               | In the last 12 months, were you physically forced to have sexual intercourse with someone even though you didn't want to?                                                                                                     | Yes=1, No=0                                                                                                                                                                                                                                       | Binary                   |
| <i>Violence victimization (past year)</i>                  | -               | Recoding of the final coding of physical and sexual violence variables.                                                                                                                                                       | 'Violence victimization' was created by considering the codes of physical violence (from never=0, Once=1, 2-5 times=2, 6-10 times=3, >10 times=4) and sexual violence (Yes=1, No=0) as scores, and combining these scores.<br>Score range: 0-5    | Continuous               |
| <i>Alcohol use (past week)</i>                             | 1               | How many days did you consume alcohol in the last one week?                                                                                                                                                                   | Responses dichotomized at the upper quartile of consumption, ≤3 vs. >3 days/week.<br>Score range: 0-7<br>(Number of days of alcohol use in the past week)                                                                                         | Binary<br><br>Continuous |
| <i>Drug use (past year)</i>                                | 2               | Have you consumed drugs such as Ganja, Heroine for pleasure in the last 12 months?<br>Have you injected drugs for nonmedical reasons in the last 12 months?                                                                   | Yes=1, No=0<br>Consumption of any drug (injection or not) was considered as 'drug use'.<br>Score range: 0-3                                                                                                                                       | Binary<br><br>Continuous |
| <b>Relevant covariates</b>                                 |                 |                                                                                                                                                                                                                               |                                                                                                                                                                                                                                                   |                          |

|                                                 |   |                                                                                                                                                                                                                                                                                                                                                                                                                                         |                                                                                                                                                                                                                                                                                           |            |
|-------------------------------------------------|---|-----------------------------------------------------------------------------------------------------------------------------------------------------------------------------------------------------------------------------------------------------------------------------------------------------------------------------------------------------------------------------------------------------------------------------------------|-------------------------------------------------------------------------------------------------------------------------------------------------------------------------------------------------------------------------------------------------------------------------------------------|------------|
| <i>Engagement in sex work (past year)</i>       | 1 | Have you received cash or gifts from men in exchange for sex in the last 12 months?                                                                                                                                                                                                                                                                                                                                                     | Yes=1, No=0                                                                                                                                                                                                                                                                               | Binary     |
| <i>Knowledge of HIV transmission risk</i>       | 5 | Can a person get HIV/AIDS?<br>a. by having unprotected sex with an infected person<br>b. by sharing infected needles<br>c. by infected blood transfusion<br>d. through mosquito bites<br>Can HIV be transmitted from an HIV infected mother to<br>e. her unborn baby during pregnancy/delivery or to the new born child through breastfeeding?                                                                                          | Yes=1, No=0<br><br>For the analysis, each correct response was coded as 1, otherwise 'zero'.<br><br>Score range: 0 to 5                                                                                                                                                                   | Continuous |
| <i>HIV risk perception</i>                      | 1 | To what extent do you feel yourself at risk to being infected with HIV/AIDS?                                                                                                                                                                                                                                                                                                                                                            | High=1, Moderate=2, Low=3, No risk=4<br>Responses were dichotomized by combining response 1 and 2 as 'High risk', 3 and 4 as 'Low risk'                                                                                                                                                   | Binary     |
| <i>Forced sex experience during adolescence</i> | 2 | How old were you when you had your first sex with a male?<br><br>Were you forced to have sex during the first sexual encounter with a male?                                                                                                                                                                                                                                                                                             | Participants who reported first sex with a male when they were <18 years (age of consent for heterosexual intercourse in India), and of them who reported forced sex during the first sexual encounter with a male, were categorised as having experienced forced sex during adolescence. | Binary     |
| <i>HIV program exposure</i>                     | 8 | Have you received following services from any NGO/program/individual/group during the last 12 months?<br>a. Received information on STI/HIV/AIDS<br>b. Received condoms<br>c. Received lubricants<br>d. Seen a demonstration on correct condom use<br>e. Received check-up and counselling for STIs<br>f. Received free medicine for STIs<br>g. Visited drop in center<br>h. Referred to other services (STI clinic, HIV testing, etc.) | Yes=1, No=0<br><br>Score range: 0 to 8                                                                                                                                                                                                                                                    | Continuous |
| <i>Social support score</i>                     | 3 | Have you received following services from any NGO/program/individual/group during the last 12 months?<br>a. Received help and support when faced with physical or sexual violence<br>b. Received help and support when faced with trouble from police<br>Are you a member of ...?<br>c. a self-help group or transgender women collective                                                                                               | Yes=1, No=0<br><br>Score range: 0 to 3                                                                                                                                                                                                                                                    | Continuous |



## 121 **Analysis**

122           The present analysis was restricted to HIV-negative transgender women (n=4,607).  
123 HIV-positive participants (n=359; 7.2%) were excluded given the objective of identifying  
124 correlates of HIV risk behavior to inform primary prevention initiatives. All analyses were  
125 conducted in Stata (version 16; College Station, Texas, USA). Descriptive statistics were used  
126 to summarize participant characteristics. Independent associations between adverse  
127 psychosocial exposures (binary) and CAS (binary) were estimated using logistic regression.  
128 The extent to which the adverse psychosocial exposures synergistically interacted with each  
129 other in their associations with CAS was examined by assessing interactions on the additive  
130 scale using linear probability regression models, and on the multiplicative scale using logistic  
131 regression models [15,18]. All possible two-way (e.g., physical violence x drug use), three-way  
132 (e.g., sexual violence x drug use x alcohol use), and four-way interaction terms (e.g., physical  
133 violence x sexual violence x drug use x alcohol use) were included in the regression models.  
134 All regression models were adjusted for age (in years), education, marital status (single vs.  
135 heterosexually married), gender-affirmative surgical status (ackwa vs. nirvan), engagement in  
136 sex work, forced sex experience during adolescence, knowledge of HIV transmission, HIV risk  
137 perception, social support, and exposure to HIV interventions. To account for the complex  
138 survey design [19] involving cluster sampling, ‘svyset’ and ‘svy’ Stata commands were used  
139 before estimating regression models [20].

140           On the additive scale in linear probability regression models, synergy is interpreted as  
141 statistically significant relative excess risk due to interaction (RERI) greater than zero; on the  
142 multiplicative scale in logistic regression models, synergy is interpreted as statistically  
143 significant coefficients on the product terms [18,21]. Multiplicative interaction estimated on  
144 the odds scale using logistic regression was re-estimated as ‘semi-elasticities’ on the  
145 probability scale using the Stata ‘margins’ command. The estimated semi-elasticities can be

146 interpreted as the proportional change in the probability of CAS that is associated with a one  
147 unit change in the covariate or with the interaction. For example, a semi-elasticity of .40 is  
148 interpreted as a 40% relative change in the expected probability of CAS associated with a one  
149 unit change in the covariate (e.g., age in years) or with the joint effect of two (PV x D) or more  
150 (PV x SV x D) exposures, above and beyond their independent associations with the outcome.

151

## 152 **Sensitivity analysis for the model of synergistically interacting** 153 **epidemics**

154 To confirm the robustness of our findings, as part of the sensitivity analysis, we  
155 specified: 1) drug use (score range, 0–3) and alcohol use (range, 0–7) as continuous exposures;  
156 2) physical and sexual violence (score range, 0–5) as a single continuous exposure, along with  
157 CAS (range, 0–4) as a continuous outcome in both sensitivity analyses.

158

## 159 **Exploratory analyses to check for rival theoretical models**

160 In addition to synergistically interacting epidemics, Tsai [22] described two other  
161 models of co-occurring epidemics—the serially causal epidemics model and mutually causal  
162 epidemics model [23]—that have been used, variably, in the literature on syndemics. Although  
163 our analysis was focused specifically on testing a model of synergistically interacting  
164 epidemics, we also tested these other two models as they may suggest alternate or  
165 complementary mechanisms of risk. To test the model of serially causal epidemics, we  
166 conceptualized alcohol (score range, 0–7) and drug use (range, 0–3) as potential mediators of  
167 the association between sexual and physical violence victimization and CAS (range, 0–4).  
168 Similarly, we tested the model of mutually causal epidemics, in which we hypothesized that  
169 violence victimization (range, 0–5) and drug use (range, 0–3) were mutually reinforcing of one

170 another, given that both were measured in the same time-period (past year). For assessing both  
171 of these models, we conducted path analysis (sem command) in Stata-16.

172

## 173 **Results**

### 174 **Participant characteristics**

175 Table 2 describes participant characteristics. Participants' mean age was 28.5 years (SD  
176 7.4) and mean number of years of education was 8.4 (SD 4.0). A majority (86.1%) were  
177 currently single. Nearly one-third (31.1%) reported sex work as their main occupation, while  
178 over half (56.8%) reported engaging in sex work during the past month. About one-fifth  
179 (18.3%) reported having experienced forced sex during adolescence (<18 years of age). More  
180 than half (57.2%) self-identified as ackwa, 42.7% as nirvan. About three-fifths (61.6%)  
181 perceived themselves at high risk for HIV infection. Reported CAS with different types of male  
182 partners in the past month ranged from 35.0% to 46.0%; CAS with any type of male partner  
183 was 45.1%.

184

185

186 **Table 2. Characteristics of HIV-negative Transgender Women who Participated in the**  
 187 **Integrated Bio-Behavioral Surveillance (IBBS) study, 2014-15 (N = 4,607)**

| Characteristics                                       | Mean (SD)        |
|-------------------------------------------------------|------------------|
| Age (in years)                                        | 28.5 (7.4)       |
| Education (years)                                     | 8.4 (4.0)        |
| HIV transmission knowledge score                      | 4.3 (1.2)        |
| HIV program exposure score                            | 4.7 (2.8)        |
| Social support score                                  | 1.7 (1.0)        |
|                                                       | <b>N (%)</b>     |
| Engagement in sex work (past month)                   | 2617 (56.8)      |
| Gender-affirmative surgical status                    |                  |
| Ackwa (pre-operative/non-operative)                   | 2636 (57.2)      |
| Nirvan (post-operative)                               | 1969 (42.7)      |
| Current marital status                                |                  |
| Single (never married/widowed/divorced/separated)     | 3940 (86.1)      |
| Married                                               | 637 (13.9)       |
| HIV risk perception <sup>a</sup>                      |                  |
| Low                                                   | 1594 (34.6)      |
| High                                                  | 2839 (61.6)      |
| Forced sex experience during adolescence              | 837 (18.2)       |
| Condomless anal sex (past month), with <sup>b</sup> : |                  |
| Regular non-paying male partner                       | 935/2033 (46.0)  |
| Paying male partners                                  | 884/2375 (37.2)  |
| Paid male partners                                    | 310/885 (35.0)   |
| Casual non-paying male partners                       | 483/1146 (42.1)  |
| Any type of male partner                              | 1502/3328 (45.1) |

188 <sup>a</sup> Percentages may not add to 100 due to missing values.

189 <sup>b</sup> Among those who had that type of partner(s) and reported anal sex during the past month.

190

## 191 **Co-occurrence of adverse psychosocial exposures**

192       Among the 4,607 HIV-negative transgender women, irrespective of other exposures,  
 193 more than one-fourth (27.3%) reported having been exposed to physical violence and 22.3%  
 194 to sexual violence. More than one-third (39.2%) had been exposed to either physical or sexual

195 violence and 10.5% to both physical and sexual violence. Over one-third (33.9%) reported  
196 frequent alcohol use and 11.5% reported drug use. Table 3 reports the co-occurrence of  
197 physical violence, sexual violence, frequent alcohol use, and drug use. Overall, 16.5% (n=698)  
198 reported two co-occurring psychosocial exposures, ranging from 1.8% (n=76) co-occurrence  
199 of alcohol and drug use to 6.1% (n=256) alcohol use and physical violence. Three exposures  
200 were reported by 5.8% (n=243), and 2.7% (n=113) reported all four exposures. About 43% of  
201 participants reported no adverse psychosocial exposures.

202

203

204 **Table 3. Adverse Psychosocial Exposures among HIV-negative Transgender Women (N**  
 205 **= 4,607): Physical Violence, Sexual Violence, Frequent Alcohol Use, Drug Use, and their**  
 206 **Co-occurrence**

| <b>Adverse psychosocial exposures and their co-occurrence</b>         | <b>n (%)<sup>a</sup></b> |
|-----------------------------------------------------------------------|--------------------------|
| Each exposure irrespective of other three exposures                   |                          |
| Physical violence, past 12 months                                     | 1257 (27.3)              |
| Sexual violence, past 12 months                                       | 1029 (22.3)              |
| Drug use, past 12 months                                              | 488 (11.5)               |
| Frequent alcohol use, past week (>3 days/week)                        | 1563 (33.9)              |
| Each exposure alone                                                   |                          |
| Physical violence                                                     | 352 (8.3)                |
| Sexual violence                                                       | 264 (6.2)                |
| Drug use                                                              | 86 (2.0)                 |
| Frequent alcohol use                                                  | 655 (15.5)               |
| Co-occurrence of exposures                                            |                          |
| Frequent alcohol use + Drug use                                       | 76 (1.8)                 |
| Frequent alcohol use + Physical violence                              | 256 (6.1)                |
| Frequent alcohol use + Sexual violence                                | 124 (2.9)                |
| Physical violence + Drug use                                          | 35 (0.8)                 |
| Sexual violence + Drug use                                            | 62 (1.5)                 |
| Physical violence + Sexual violence                                   | 145 (3.4)                |
| Physical violence + Drug use + Frequent alcohol use                   | 40 (1.0)                 |
| Sexual violence + Drug use + Frequent alcohol use                     | 59 (1.4)                 |
| Physical violence + Sexual violence + Frequent alcohol use            | 127 (3.0)                |
| Physical violence + Sexual violence + Drug use                        | 17 (0.4)                 |
| Physical violence + Sexual violence + Frequent alcohol use + Drug use | 113 (2.7)                |
| No adverse psychosocial exposures                                     | 1814 (42.9)              |

207 <sup>a</sup> Percentages may not add to 100 due to missing values

208

209

## 210 **Perpetrators of physical or sexual violence**

211           Among those who experienced sexual violence (n=1,029), over one-third (35.9%;  
212 n=369) reported more than one type of perpetrator. Perpetrators were identified as strangers  
213 (41.1%), thugs (23.9%), clients (23.2%), and family members (21.8%). Among those who  
214 experienced physical violence (n=1,257), 32.5% (n=409) reported more than one perpetrator  
215 type. Perpetrators were identified as strangers (33.0%), police (24.5%), thugs (21.2%), family  
216 members (20.0%), and clients (17.3%).

217

## 218 **Synergistic interactions between adverse psychosocial exposures**

219           Using logistic regression to model CAS, without product terms, physical violence [PV]  
220 had a statistically significant association with CAS (aOR=1.94, 95% CI: 1.47–2.56; p<.001),  
221 while frequent alcohol use [A] (aOR = 1.32, 95% CI: .98–1.77; p=.07), drug use [D] (aOR  
222 =.86, 95% CI: .60–1.22; p=.40) and sexual violence [SV] (aOR = .97, 95% CI: .73–1.29; p=.86)  
223 did not have statistically significant associations with CAS. Among the other covariates  
224 included in the multivariable logistic regression model of main effects without product terms,  
225 higher levels of education (aOR=.93, 95% CI: .90–.97; p<.001), being unmarried (aOR=.64,  
226 95% CI: .45–.92; p=.016), and nirvan gender-affirmative surgical status (aOR=.68, 95% CI:  
227 .52–.88; p=.003) were associated with lower odds of CAS, and forced sex during adolescence  
228 with higher odds of CAS (aOR=1.35, 95% CI: 1.02–1.78; p=.04).

229           Out of six logistic regression models that included main effects and two-way product  
230 terms, the following product terms were statistically significant: PV x D (Model 1) and PV x  
231 SV (Model 5) (Table 4). In the additional five logistic regression models that included main  
232 effects and two- and three-way product terms, the following were statistically significant: PV  
233 x D (Model 7), PV x A x D (Models 8, 9, 10, and 11), D x PV x SV (Model 10) and A x PV x  
234 SV (Models 11 and 12). In the final logistic regression model that included all possible product

235 terms, including a four-way product term, only A x PV x SV was statistically significant.

236 Assessment of interactions on the additive scale using linear probability regression models

237 showed similar results (Table 5).



238 **Table 4. Effect of Adverse Psychosocial Exposures on Condomless Anal Sex with Male Partners among HIV-negative Transgender**  
 239 **Women: Measures of Multiplicative Two-/Three-/Four-way Interactions between Physical Violence, Sexual Violence, Drug Use, and**  
 240 **Frequent Alcohol Use (N = 4,607)**  
 241

| Adverse psychosocial exposures and product terms | Effects on condomless anal sex                 |                    |                     |                     |                    |                    |                                                                                       |                                                          |                                                                           |                                                                                              |                                                                                                              |                                                                                                                            |
|--------------------------------------------------|------------------------------------------------|--------------------|---------------------|---------------------|--------------------|--------------------|---------------------------------------------------------------------------------------|----------------------------------------------------------|---------------------------------------------------------------------------|----------------------------------------------------------------------------------------------|--------------------------------------------------------------------------------------------------------------|----------------------------------------------------------------------------------------------------------------------------|
|                                                  | Model 1:                                       | Model 2:           | Model 3:            | Model 4:            | Model 5:           | Model 6:           | Model 7:                                                                              | Model 8:                                                 | Model 9:                                                                  | Model 10:                                                                                    | Model 11:                                                                                                    | Model 12:                                                                                                                  |
|                                                  | Models with one two-way product term at a time |                    |                     |                     |                    |                    | All two-way product terms<br>PV x D<br>PV x A<br>SV x D<br>SV x A<br>PV x SV<br>A x D | All two-way + one three-way product term<br>(PV x A x D) | All two-way + two three-way product terms<br>(PV x A x D)<br>(SV x A x D) | All two-way + three three-way product terms<br>(PV x A x D)<br>(SV x A x D)<br>(D x PV x SV) | All two-way + four three-way product terms<br>(PV x A x D)<br>(SV x A x D)<br>(D x PV x SV)<br>(A x PV x SV) | All two-way + All three-way + four-way product terms<br>(PV x A x D)<br>(SV x A x D)<br>(D x PV x SV)<br>(A x D x PV x SV) |
|                                                  | PV x D                                         | PV x A             | SV x D              | SV x A              | PV x SV            | A x D              |                                                                                       |                                                          |                                                                           |                                                                                              |                                                                                                              |                                                                                                                            |
|                                                  | Estimated semi-elasticity (95% CI), p value    |                    |                     |                     |                    |                    |                                                                                       |                                                          |                                                                           |                                                                                              |                                                                                                              |                                                                                                                            |
| PV x D                                           | .48<br>(.27, .69)***                           |                    |                     |                     |                    |                    | .47<br>(.23, .71)***                                                                  | -.17<br>(-.83, .48)                                      | -.14<br>(-.79, .52)                                                       | -.39<br>(-1.20, .42)                                                                         | -.25<br>(-.99, .49)                                                                                          | -.11<br>(-.88, .65)                                                                                                        |
| PV x A                                           |                                                | .13<br>(-.16, .42) |                     |                     |                    |                    | -.03<br>(-.28, .31)                                                                   | -.08<br>(-.43, .27)                                      | -.09<br>(-.45, .26)                                                       | -.09<br>(-.44, .26)                                                                          | -.38<br>(-.84, .08)                                                                                          | -.36<br>(-.83, .11)                                                                                                        |
| SV x D                                           |                                                |                    | -.02<br>(-.39, .35) |                     |                    |                    | -.12<br>(-.53, .29)                                                                   | -.21<br>(-.64, .22)                                      | -.02<br>(-.54, .58)                                                       | -.13<br>(-.77, .52)                                                                          | -.12<br>(-.75, .52)                                                                                          | -.04<br>(-.69, .61)                                                                                                        |
| SV x A                                           |                                                |                    |                     | -.01<br>(-.33, .30) |                    |                    | -.10<br>(-.43, .24)                                                                   | -.06<br>(-.39, .26)                                      | -.01<br>(-.35, .33)                                                       | .01<br>(-.33, .34)                                                                           | -.38<br>(-.91, .14)                                                                                          | -.36<br>(-.89, .18)                                                                                                        |
| PV x SV                                          |                                                |                    |                     |                     | .29<br>(.04, .53)* |                    | .23<br>(-.04, .49)                                                                    | .21<br>(-.06, .48)                                       | .22<br>(-.05, .48)                                                        | .13<br>(-.18, .44)                                                                           | .31<br>(-.76, .14)                                                                                           | -.28<br>(-.75, .19)                                                                                                        |
| A x D                                            |                                                |                    |                     |                     |                    | .08<br>(-.27, .43) | -.06<br>(-.49, .36)                                                                   | -.40<br>(-1.0, .19)                                      | -.23<br>(-.90, .44)                                                       | -.17<br>(-.81, .47)                                                                          | -.11<br>(-.73, .51)                                                                                          | -.05<br>(-.69, .59)                                                                                                        |
| PV x A x D                                       |                                                |                    |                     |                     |                    |                    |                                                                                       | .69<br>(.38, 1.0)***                                     | .69<br>(.38, 1.0)***                                                      | .65<br>(.29, 1.0)***                                                                         | .61<br>(.23, .99)**                                                                                          | .52<br>(-.04, 1.08)                                                                                                        |
| SV x A x D                                       |                                                |                    |                     |                     |                    |                    |                                                                                       |                                                          | -.39<br>(-1.32, .54)                                                      | -.65<br>(-1.72, .43)                                                                         | -.53<br>(-1.56, .49)                                                                                         | -.74<br>(-2.09, .61)                                                                                                       |
| D x PV x SV                                      |                                                |                    |                     |                     |                    |                    |                                                                                       |                                                          |                                                                           | .51<br>(.06, .96)*                                                                           | .34<br>(-.24, .93)                                                                                           | .06<br>(-1.13, 1.25)                                                                                                       |
| A x PV x SV                                      |                                                |                    |                     |                     |                    |                    |                                                                                       |                                                          |                                                                           |                                                                                              | .66<br>(.35, .97)***                                                                                         | .63<br>(.27, .99)***                                                                                                       |
| A x D x PV x SV                                  |                                                |                    |                     |                     |                    |                    |                                                                                       |                                                          |                                                                           |                                                                                              |                                                                                                              | .40<br>(-.64, 1.46)                                                                                                        |

242 PV, physical violence in the past year; SV, sexual violence in the past year; D, drug use in the past year; A: frequent alcohol use in the past week.  
243 All models adjusted for age, education, marital status, sexual identity, forced sex experience during adolescence, HIV risk perception, knowledge  
244 HIV transmission risk, social support, and HIV program exposure.  
245 The estimates of the main effects are not shown.  
246 Interpretation of semi-elasticity: a semi-elasticity of .48, for example in Model 1, is interpreted as a 48% relative change in the probability of  
247 condomless anal sex that is associated with the joint effect of physical violence and drug use, above and beyond their independent associations  
248 with the outcome.  
249 \* $p < .05$ , \*\* $p < .01$ , \*\*\* $p < .001$ .

250

251

252

253 **Table 5. Effect of Adverse Psychosocial Exposures on Condomless Anal Sex with Male Partners among HIV-negative Transgender**  
 254 **Women: Measures of Additive Two-/Three-/Four-way Interactions between Physical Violence, Sexual Violence, Drug Use, and Frequent**  
 255 **Alcohol Use (n = 4,607)**  
 256

| Adverse psychosocial exposures and product terms | Effects on condomless anal sex                 |                    |                     |                      |                    |                    |                                                                                       |                                                          |                                                                           |                                                                                              |                                                                                                              |                                                                                                                            |
|--------------------------------------------------|------------------------------------------------|--------------------|---------------------|----------------------|--------------------|--------------------|---------------------------------------------------------------------------------------|----------------------------------------------------------|---------------------------------------------------------------------------|----------------------------------------------------------------------------------------------|--------------------------------------------------------------------------------------------------------------|----------------------------------------------------------------------------------------------------------------------------|
|                                                  | Model 1:                                       | Model 2:           | Model 3:            | Model 4:             | Model 5:           | Model 6:           | Model 7:                                                                              | Model 8:                                                 | Model 9:                                                                  | Model 10:                                                                                    | Model 11:                                                                                                    | Model 12:                                                                                                                  |
|                                                  | Models with one two-way product term at a time |                    |                     |                      |                    |                    | All two-way product terms<br>PV x D<br>PV x A<br>SV x D<br>SV x A<br>PV x SV<br>A x D | All two-way + one three-way product term<br>(PV x A x D) | All two-way + two three-way product terms<br>(PV x A x D)<br>(SV x A x D) | All two-way + three three-way product terms<br>(PV x A x D)<br>(SV x A x D)<br>(D x PV x SV) | All two-way + four three-way product terms<br>(PV x A x D)<br>(SV x A x D)<br>(D x PV x SV)<br>(A x PV x SV) | All two-way + All three-way + four-way product terms<br>(PV x A x D)<br>(SV x A x D)<br>(D x PV x SV)<br>(A x D x PV x SV) |
|                                                  | PV x D                                         | PV x A             | SV x D              | SV x A               | PV x SV            | A x D              |                                                                                       |                                                          |                                                                           |                                                                                              |                                                                                                              |                                                                                                                            |
| <i>b</i> (95% CI), <i>p</i> value                |                                                |                    |                     |                      |                    |                    |                                                                                       |                                                          |                                                                           |                                                                                              |                                                                                                              |                                                                                                                            |
| PV x D                                           | .24<br>(.11, .37)***                           |                    |                     |                      |                    |                    | .23<br>(.08, .37)**                                                                   | -.07<br>(-.31, .18)                                      | -.05<br>(-.31, .19)                                                       | -.12<br>(-.39, .14)                                                                          | -.07<br>(-.33, .19)                                                                                          | -.05<br>(-.34, .24)                                                                                                        |
| PV x A                                           |                                                | .05<br>(-.07, .19) |                     |                      |                    |                    | -.01<br>(-.12, .14)                                                                   | -.03<br>(-.18, .11)                                      | -.04<br>(-.18, .10)                                                       | -.04<br>(-.18, .11)                                                                          | -.14<br>(-.31, .02)                                                                                          | -.14<br>(-.31, .03)                                                                                                        |
| SV x D                                           |                                                |                    | -.01<br>(-.16, .14) |                      |                    |                    | -.04<br>(-.19, .10)                                                                   | -.07<br>(-.21, .08)                                      | -.005<br>(-.22, .23)                                                      | -.04<br>(-.27, .20)                                                                          | -.03<br>(-.26, .20)                                                                                          | -.02<br>(-.27, .23)                                                                                                        |
| SV x A                                           |                                                |                    |                     | -.005<br>(-.13, .12) |                    |                    | -.04<br>(-.17, .09)                                                                   | -.02<br>(-.15, .11)                                      | -.004<br>(-.15, .14)                                                      | -.002<br>(-.14, .14)                                                                         | -.14<br>(-.32, .04)                                                                                          | -.13<br>(-.33, .05)                                                                                                        |
| PV x SV                                          |                                                |                    |                     |                      | .13<br>(.01, .25)* |                    | .10<br>(-.03, .22)                                                                    | .09<br>(-.04, .21)                                       | .09<br>(-.03, .22)                                                        | .05<br>(-.09, .20)                                                                           | -.11<br>(-.28, .05)                                                                                          | -.11<br>(-.28, .06)                                                                                                        |
| A x D                                            |                                                |                    |                     |                      |                    | .03<br>(-.12, .18) | -.02<br>(-.18, .13)                                                                   | -.13<br>(-.32, .05)                                      | -.08<br>(-.31, .15)                                                       | -.06<br>(-.29, .18)                                                                          | -.03<br>(-.26, .20)                                                                                          | -.02<br>(-.27, .22)                                                                                                        |
| PV x A x D                                       |                                                |                    |                     |                      |                    |                    |                                                                                       | .40<br>(.08, .71)*                                       | .40<br>(.08, .71)*                                                        | .35<br>(-.02, .68)                                                                           | .31<br>(-.01, .63)                                                                                           | .28<br>(-.12, .68)                                                                                                         |
| SV x A x D                                       |                                                |                    |                     |                      |                    |                    |                                                                                       |                                                          | -.11<br>(-.40, .18)                                                       | -.17<br>(-.46, .13)                                                                          | -.11<br>(-.41, .18)                                                                                          | -.13<br>(-.48, .21)                                                                                                        |
| D x PV x SV                                      |                                                |                    |                     |                      |                    |                    |                                                                                       |                                                          |                                                                           | .20<br>(-.08, .48)                                                                           | .08<br>(-.21, .37)                                                                                           | .02<br>(-.49, .54)                                                                                                         |
| A x PV x SV                                      |                                                |                    |                     |                      |                    |                    |                                                                                       |                                                          |                                                                           |                                                                                              | .36<br>(.10, .63)**                                                                                          | .35<br>(.06, .65)*                                                                                                         |
| A x D x PV x SV                                  |                                                |                    |                     |                      |                    |                    |                                                                                       |                                                          |                                                                           |                                                                                              |                                                                                                              | .07<br>(-.54, .69)                                                                                                         |

257 PV, physical violence in the past year; SV, Sexual violence in the past year; D, drug use in the past year; A, frequent alcohol use in the past week.

258 All models adjusted for age, education, marital status, sexual identity, forced sex experience during adolescence, HIV risk perception, knowledge  
259 HIV transmission risk, social support, and HIV program exposure.  
260 The estimates of the main effects are not shown.  
261 '*b*' represents the estimated regression coefficient on the product term which indicates the relative excess risk due to interaction (RERI) used to  
262 assess additive interaction.  
263 \* $p < .05$ , \*\* $p < .01$ , \*\*\* $p < .001$ .

## 264 **Sensitivity analysis for the model of synergistically interacting** 265 **epidemics**

266 The sensitivity analysis specifying drug use and alcohol use as continuous exposures,  
267 physical and sexual violence as a single continuous exposure (violence victimization), and CAS  
268 as a continuous outcome, showed a similar pattern of two- and three-way interactions (see S1  
269 Table).

270

## 271 **Rival theoretical models: serially causal and mutually causal** 272 **epidemics**

273 In the model of serially causal epidemics, we estimated a statistically significant total  
274 indirect effect of sexual violence (estimate=.04, 95% CI: .003–.07;  $p=.03$ ) on CAS through drug  
275 use and alcohol use, but the indirect effect of physical violence was not statistically significant.  
276 In the model of mutually causal epidemics, we found that violence victimization had a  
277 statistically significant association with drug use (estimate=.18, 95% CI: .15–.22;  $p<.001$ ) and  
278 drug use had a statistically significant association with violence victimization (estimate=1.97,  
279 95% CI: 1.38–2.56;  $p<.001$ ). The model fit (SRMR<.02) and the stability index (.60) were  
280 good (see S2 Table).

281

## 282 **Discussion**

283 In this large, cross-sectional, probability-based analytical sample of HIV-negative  
284 transgender women in India, we tested a model of synergistically interacting epidemics, based  
285 on the joint effects of four psychosocial exposures—physical and sexual violence  
286 victimization, drug use, and alcohol use—on CAS. The high prevalence of these adverse

287 psychosocial exposures, their frequent co-occurrence, and their synergistic interactions support  
288 the presence of synergistically interacting epidemics, or a syndemic. On both multiplicative  
289 and additive scales, we found evidence of two-way synergistic interactions between physical  
290 violence victimization and sexual violence victimization, and between physical violence  
291 victimization and drug use. We found evidence of three-way synergistic interactions between  
292 physical violence victimization, sexual violence, and alcohol use; and between physical  
293 violence victimization, drug use and alcohol use. Our findings suggest that a harmful social-  
294 structural environment for transgender women in India contributes to clustering of  
295 psychosocial health problems significantly associated with increased HIV risk, with  
296 ramifications for targeted HIV prevention initiatives.

297         The high levels of physical (27.3%) and sexual violence (22.3%) victimization faced  
298 by transgender women are corroborated by other studies from India [13,14,24]. A study from  
299 Karnataka reported past-year sexual violence prevalence of 18%, but did not disaggregate  
300 results among the combined sample of 543 men who have sex with men and transgender  
301 women [14]. In a study with 300 transgender women in four states, 84% reported having ever  
302 experienced physical and/or sexual violence [13]. Notably, in the present study, about one-  
303 third of those who experienced violence reported multiple perpetrators: family  
304 members/relatives, thugs, police, strangers, and sex work clients. Thus, not only do a  
305 substantial proportion of transgender women face violence; they experience violence across a  
306 myriad of settings in their social ecology—family, work, community settings, and in  
307 interactions with law enforcement officers, ostensibly positioned to offer protection from  
308 violence. A latent class analysis of patterns of violence victimization among transgender  
309 women in India (n=299) indicated that the type (verbal, physical, or sexual) of violence  
310 victimization differentially influenced HIV risk; those who experienced police-perpetrated  
311 sexual assault vs. police-perpetrated physical violence had relatively higher risk of CAS [24].

312 However, that study did not assess synergistic effects, such as those identified in the present  
313 study between physical and sexual violence, nor their interactions with alcohol and drug use.

314 Studies among gender and sexual minority populations in other contexts [25,26]  
315 indicate that the presence of multiple types and domains of violence victimization is likely to  
316 substantially increase psychological distress. The present study further demonstrates that  
317 multiple forms of violence victimization against transgender women, and in conjunction with  
318 drug use and alcohol use, contribute to synergistically increasing HIV risk. In India, physical  
319 violence from family members has been shown to be a manifestation of non-acceptance of  
320 gender identity, with violence reportedly perpetrated as a form of disciplining [27]. Physical  
321 and sexual violence from police and thugs in India have been identified as even more common  
322 among those transgender women who engage in sex work [28]. The multiple forms and  
323 domains of violence victimization can be seen as the manifestation of systemic stigma and  
324 discrimination undergirded by lack of acceptance of transgender people in the family and  
325 society; and this is exacerbated by the lack of legal protections for those who engage in sex  
326 work [29].

327 The associations identified using models of synergistically interacting epidemics or  
328 mediational analyses have been demonstrated among transgender women in other countries.  
329 For example, studies among transgender women in North and South America indicate that life  
330 stressors [30], discrimination [31,32] and trauma [33] can lead to alcohol and/or substance use,  
331 possibly as maladaptive coping strategies. A longitudinal study among transgender women in  
332 the U.S. showed a causal association between sexual violence and drug use [34]. In several  
333 other studies with transgender women, alcohol use [35] and drug use [36], including sexualized  
334 drug use [37], were associated with increased HIV risk. As identified among other populations,  
335 such as gay and bisexual men, being under the influence of alcohol or drugs may increase the  
336 likelihood of engaging in sex and the risk of CAS [38,39]. Thus, experiences of sexual violence

337 can precipitate drug or alcohol use as a coping mechanism, and alcohol and drug use (especially  
338 before or during sex) in turn may increase the likelihood of being targeted or otherwise  
339 exacerbate sexual or physical violence from male partners [37], which increases the risk of  
340 engaging in CAS. Given evidence that internalized transprejudice and depression may stem in  
341 part from discrimination and violence victimization [40,41], future studies should explore the  
342 potential mediating roles of internalized transprejudice and depression in the association  
343 between physical and sexual violence victimization and discrimination, and HIV transmission  
344 risk behavior.

345

## 346 **Implications for practice and policy**

347         Given that larger societal forces, including negative attitudes and systemic stigma and  
348 discrimination against transgender persons, and criminalization of sex work, contribute to  
349 violence victimization—as well as indirectly leading to alcohol and drug use through  
350 internalized stigma and depression [11,29,42]—addressing these social and structural factors  
351 is crucial. Currently, ‘crisis response’ teams established in NACO-supported targeted HIV  
352 interventions act only *after* incidents of violence are reported; and we are aware of no societal-  
353 level campaigns in India designed to prevent discrimination and violence against transgender  
354 women in relation to their intersecting marginalized identities (e.g., gender minority *and* sex  
355 worker and/or HIV-positive status). Important progress is evidenced in the passage of The  
356 Transgender Persons (Protection of Rights) Act, 2019 [43] and Rules, 2020 [44], in India,  
357 which explicitly states that transgender persons should not be discriminated against and  
358 prescribes punishment for those who discriminate or perpetrate violence. Nevertheless,  
359 disparities such as punishments for sexual violence against transgender women being less  
360 severe than that for cisgender women highlight ongoing challenges with protective policies and



361 the devaluation of transgender women’s rights and lives. It is also vital to ensure the  
362 implementation of these policies on the ground.

363 Our findings further indicate that physical violence victimization independently, and  
364 together with sexual violence, drug use and alcohol use synergistically increase CAS. That is,  
365 in the presence of physical violence victimization, relatively higher levels of CAS were  
366 observed with one or more combinations of sexual violence victimization, drug use and/or  
367 alcohol use. Thus, addressing all four exposures through integrated, multicomponent  
368 interventions may substantially reduce HIV risk [45]; however, in the context of synergistic  
369 interactions, single-component interventions (e.g., post-care support for survivors of sexual  
370 violence or treatment of alcohol or drug dependence) may still exert an incremental impact on  
371 reducing HIV transmission risk behavior.

372 Partial support for the model of serially causal epidemics—i.e., sexual violence  
373 victimization leading to alcohol and drug use, and possible mutually causal associations  
374 between violence victimization and drug use—suggest the utility of multilevel interventions:  
375 at the individual level, screening for and managing alcohol and drug use; and at the societal  
376 level, strengthening stigma and violence reduction or elimination programs. Although alcohol  
377 use and drug use were not independently statistically significant predictors of CAS (main  
378 effects model), in the presence of sexual and/or physical violence victimization, alcohol use  
379 and/or drug use substantially increased CAS. Nongovernmental (NGOs) and community-based  
380 organizations (CBOs) that implement targeted HIV preventive interventions for transgender  
381 women should establish or strengthen referral systems with public hospitals offering treatment  
382 for alcohol and drug dependence, post-violence (physical or sexual) support services, and post-  
383 sexual exposure prophylaxis. To this end, training and monitoring healthcare providers to  
384 ensure nondiscriminatory and gender-affirmative care is crucial. Similarly, support is required  
385 from police in duly filing complaints of sexual or physical violence, given that transgender

386 persons are not covered in current sexual assault/rape laws (Indian Penal Code, Section 354)—  
387 a pernicious lapse in legal policy. Further, in addition to HIV and condom education and  
388 condom distribution, NGOs and CBOs should educate transgender women about the negative  
389 effects of alcohol and drug use on sexual decision-making and negotiation, counselling and  
390 supporting them to reduce or avoid drug or alcohol use before or during sex.

391

## 392 **Limitations and strengths**

393 In addition to its strengths, this study has several limitations. First, the cross-sectional  
394 data preclude causal interpretations. However, theoretical frameworks and compatible recall  
395 periods for the adverse psychosocial exposures (physical and sexual violence victimization,  
396 one year; drug use, one year), support the plausibility of the three models tested. Second, our  
397 analysis was restricted to co-occurrence and interactions between exposures at the individual  
398 level, while the concept of a syndemic is a population-level phenomenon; multilevel analyses  
399 at the population level should be undertaken in future research. Nevertheless, this is among the  
400 largest probability-based studies of syndemics among transgender women [46], and had a high  
401 response rate (81%). Our use of appropriate statistical analyses (interactions on both additive  
402 and multiplicative scales) to assess synergy is another strength, given several studies that  
403 purportedly assessed syndemics and HIV risk among transgender women did not use such  
404 analytic techniques [46], among very few that did [47]. In line with current practice, we  
405 dichotomized the adverse psychosocial exposures in additive and multiplicative interactions  
406 [18]; however, sensitivity analyses revealed that similar findings were obtained if we used  
407 different ways of specifying exposures, strengthening the evidence for synergy among  
408 exposures.

409

410

## 411 **Conclusion**

412           This study found evidence for synergistic (additive and multiplicative) interactions  
413 between sexual and physical violence victimization, drug use, and alcohol use on HIV  
414 transmission risk behavior among transgender women. Our findings support the need to focus  
415 on preventing and eliminating violence victimization, as well as the importance of preventing  
416 or mitigating multiple co-occurring adverse psychosocial exposures, in order to reduce HIV  
417 risk among transgender women in India.

## 418 **Acknowledgements**

419 We thank Dr. Arvind Pandey and Ms. Abhina Aher for their helpful comments on an earlier

420 version of the manuscript.

421

## 422 **References**

- 423 1. Poteat T, Scheim A, Xavier J, Reisner S, Baral S. Global epidemiology of HIV infection  
424 and related syndemics affecting transgender people. *J Acquir Immune Defic Syndr.*  
425 2016;72(Suppl 3):S210-219.
- 426 2. Hatzenbuehler ML, Pachankis JE. Stigma and minority stress as social determinants of  
427 health among lesbian, gay, bisexual, and transgender youth: Research evidence and  
428 clinical implications. *Pediatr Clin North Am.* 2016;63(6):985-997.
- 429 3. Rajan S, Kumar P, Sangal B, Kumar A, Ramanathan S, Ammassari S. HIV/AIDS-Related  
430 risk behaviors, HIV prevalence, and determinants for HIV prevalence among  
431 hijra/transgender people in India: Findings from the 2014-2015 integrated biological and  
432 behavioural surveillance. *Indian J Public Health.* 2020;64(Supplement):S53-S60.
- 433 4. NACO. HIV Sentinel Surveillance: Technical Brief, India 2016-17. New Delhi: National  
434 AIDS Control Organisation, Ministry of Health and Family Welfare, Government of  
435 India.; 2017.
- 436 5. National AIDS Control Organization (NACO). Sankalak: Status of National AIDS  
437 Response. NACO. 2020. Available from: [http://naco.gov.in/nacoevents/release-](http://naco.gov.in/nacoevents/release-sankalak-status-national-aids-response)  
438 [sankalak-status-national-aids-response](http://naco.gov.in/nacoevents/release-sankalak-status-national-aids-response)
- 439 6. Chakrapani V, Willie TC, Shunmugam M, Kershaw TS. Syndemic classes, stigma, and  
440 sexual risk among transgender women in India. *AIDS Behav.* 2019;23(6):1518-1529.
- 441 7. Singer M. A dose of drugs, a touch of violence, a case of AIDS: Conceptualizing the  
442 SAVA syndemic. *Free Inquiry Creative Sociol.* 1996;24:99-110.
- 443 8. Parsons JT, Antebi-Gruszka N, Millar BM, Cain D, Gurung S. Syndemic conditions, HIV  
444 transmission risk behavior, and transactional sex among transgender women. *AIDS*  
445 *Behav.* 2018;22(7):2056-2067.

- 446 9. Stall R, Mills TC, Williamson J, Hart T, Greenwood G, Paul J, et al. Association of co-  
447 occurring psychosocial health problems and increased vulnerability to HIV/AIDS among  
448 urban men who have sex with men. *Am J Public Health*. 2003;93(6):939-942.
- 449 10. Stall R, Friedman M, Catania JA. Interacting epidemics and gay men's health: A theory  
450 of syndemic production among urban gay men. In: Wolitski RJ, Stall R, Valdiserri RO,  
451 editors. *Unequal opportunity: health disparities affecting gay and bisexual men in the*  
452 *United States*. New York: Oxford University Press; 2008. pp. 251-274.
- 453 11. Chakrapani V, Newman PA, Shunmugam M. Stigma toward and mental health of  
454 hijras/trans women and self-identified men who have sex with men in India. In:  
455 Nakamura N, Logie CH, editors. *LGBTQ mental health: International perspectives and*  
456 *experiences*. Washington: American Psychological Association; 2020. pp. 103-119.
- 457 12. Chakrapani V, Vijin PP, Logie CH, Newman PA, Shunmugam M, Sivasubramanian M,  
458 et al. Understanding how sexual and gender minority stigmas influence depression among  
459 trans women and men who have sex with men in India. *LGBT Health*. 2017;4(3):217-  
460 226.
- 461 13. Chakrapani V, Newman PA, Shunmugam M, Logie CH, Samuel M. Syndemics of  
462 depression, alcohol use, and victimisation, and their association with HIV-related sexual  
463 risk among men who have sex with men and transgender women in India. *Glob Public*  
464 *Health*. 2017;12(2):250-265.
- 465 14. Shaw SY, Lorway RR, Deering KN, Avery L, Mohan HL, Bhattacharjee P, et al. Factors  
466 associated with sexual violence against men who have sex with men and transgendered  
467 individuals in Karnataka, India. *PLoS One*. 2012;7(3):e31705.
- 468 15. Tsai AC, Venkataramani AS. Syndemics and health disparities: A methodological note.  
469 *AIDS Behav*. 2016;20(2):423-30.
- 470 16. VanderWeele TJ, Knol MJ. A tutorial on interaction. *Epidemiol Methods*. 2014;3:33-72.

- 471 17. National AIDS Control Organization (NACO). National IBBS 2014-15:  
472 Hijras/Transgender people. NACO. 2016. Available from:  
473 [http://naco.gov.in/sites/default/files/TG-IBBS%20ReportPrint%20text\\_Edited.pdf](http://naco.gov.in/sites/default/files/TG-IBBS%20ReportPrint%20text_Edited.pdf)
- 474 18. VanderWeele TJ. Explanation in causal inference: Methods for mediation and  
475 interaction. New York: Oxford University Press; 2015.
- 476 19. Solon G, Haider SJ, Wooldridge JM. What are we weighting for? *J Hum Resour.*  
477 2015;50(2):301-316.
- 478 20. Heeringa SG, West BT, Berglund PA. Applied survey data analysis. New York: Chapman  
479 and Hall/CRC; 2010.
- 480 21. Knol MJ, VanderWeele TJ. Recommendations for presenting analyses of effect  
481 modification and interaction. *Int J Epidemiol.* 2012;41(2):514-520.
- 482 22. Tsai AC. Syndemics: A theory in search of data or data in search of a theory? *Soc Sci*  
483 *Med.* 2018;206:117-122.
- 484 23. Kuh D, Ben-Shlomo Y, Lynch J, Hallqvist J, Power C. Life course epidemiology. *J*  
485 *Epidemiol Community Health.* 2003;57(10):778-783.
- 486 24. Willie T, Chakrapani V, White Hughto J, S. Kershaw T. Victimization and human  
487 immunodeficiency virus-related risk among transgender women in India: A latent profile  
488 analysis. *Violence Gend.* 2017;4(4):121-9.
- 489 25. Newman PA, Fantus S, Woodford MR, Rwigema M-J. “Pray that God will change you”:  
490 The religious social ecology of bias-based bullying targeting sexual and gender minority  
491 youth—A qualitative study of service providers and educators. *J Adolesc Res.*  
492 2017;33(5):523-548.
- 493 26. Sterzing PR, Ratliff GA, Gartner RE, McGeough BL, Johnson KC. Social ecological  
494 correlates of polyvictimization among a national sample of transgender, genderqueer, and  
495 cisgender sexual minority adolescents. *Child Abuse Negl.* 2017;67:1-12.

- 496 27. Chakrapani V, Dhall P. Family acceptance among self-identified men who have sex with  
497 men (MSM) and transgender people in India. Mumbai: Family Planning Association of  
498 India; 2011.
- 499 28. Ganju D, Saggurti N. Stigma, violence and HIV vulnerability among transgender persons  
500 in sex work in Maharashtra, India. *Cult Health Sex.* 2017;19(8):903-917.
- 501 29. Chakrapani V, Newman AP, Noronha E. Hijras/Transgender women and sex work in  
502 India: From marginalization to social protection. In: Nuttbrock LA, editor. *Transgender  
503 sex work & society.* New York: Harrington Park Press; 2018. pp. 214-235.
- 504 30. Hotton AL, Garofalo R, Kuhns LM, Johnson AK. Substance use as a mediator of the  
505 relationship between life stress and sexual risk among young transgender women. *AIDS  
506 Educ Prev.* 2013;25(1):62-71.
- 507 31. Ehlinger PP, Folger A, Crouce JM. A qualitative analysis of transgender and gender  
508 nonconforming college students' experiences of gender-based discrimination and  
509 intersections with alcohol use. *Psychol Addict Behav.* 2021.
- 510 32. Kcomt L, Evans-Polce RJ, Boyd CJ, McCabe SE. Association of transphobic  
511 discrimination and alcohol misuse among transgender adults: Results from the U.S.  
512 Transgender Survey. *Drug Alcohol Depend.* 2020;215:108223.
- 513 33. Johnson EEH, Wilder SMJ, Andersen CVS, Horvath SA, Kolp HM, Gidycz CA, et al.  
514 Trauma and alcohol use among transgender and gender diverse women: An examination  
515 of the stress-buffering hypothesis of social support. *J Prim Prev.* 2021;42(6):567-581.
- 516 34. Smith LR, Yore J, Triplett DP, Urada L, Nemoto T, Raj A, et al. Impact of sexual violence  
517 across the lifespan on HIV risk behaviors among transgender women and cisgender  
518 people living with HIV. *J Acquir Immune Defic Syndr.* 2017;75(4):408-416.
- 519 35. Hearld KR, Milner AN, Budhwani H, Abreau N, Rodriguez-Lauzurique RM, Charow R,  
520 et al. Alcohol use, high risk behaviors, and experiences of discrimination among



- 521 transgender women in the Dominican Republic. *Subst Use Misuse*. 2019;54(10):1725-  
522 1733.
- 523 36. Avila MM, Dos Ramos Farias MS, Fazzi L, Romero M, Reynaga E, Marone R, et al.  
524 High Frequency of illegal drug use influences condom use among female transgender sex  
525 workers in Argentina: Impact on HIV and syphilis infections. *AIDS Behav*.  
526 2017;21(7):2059-2068.
- 527 37. Fan X, Lau JTF, Cai Y, Li J, Ma T, Gu J, et al. Prevalence and associated factors of  
528 sexualized drug use in sex work among transgender women sex workers in China. *AIDS*  
529 *Care*. 2021;33(8):1098-1106.
- 530 38. Redina HJ, Moody RL, Ventuneac A, Grov C, Parsons JT. Aggregate and event-level  
531 associations between substance use and sexual behavior among gay and bisexual men:  
532 Comparing retrospective and prospective data. *J Alcohol Drug Depend*. 2015;154:199-  
533 207.
- 534 39. Theodore PS, Duran RE, Antoni MH. Drug use and sexual risk among gay and bisexual  
535 men who frequent party venues. *AIDS Behav*. 2014;18(11):2178-86.
- 536 40. Kaighobadi F, Collier KL, Reddy V, Lane T, Sandfort TGM. Sexual violence experiences  
537 among black gay, bisexual, and other men who have sex with men and transgender  
538 women in South African townships: Contributing factors and implications for health. *S*  
539 *Afr J Psychol*. 2020;50(2):170-182.
- 540 41. Logie CH, Lacombe-Duncan A, Poteat T, Wagner AC. Syndemic factors mediate the  
541 relationship between sexual stigma and depression among sexual minority women and  
542 gender minorities. *Womens Health Issues*. 2017;27(5):592-599.
- 543 42. Meyer IH. Prejudice, social stress, and mental health in lesbian, gay, and bisexual  
544 populations: Conceptual issues and research evidence. *Psychol Bull*. 2003;129(5):674-  
545 697.

- 546 43. Government of India. The Transgender Persons (Protection of Rights) Act, 2019. No. 40.  
547 December 5, 2019. [https://www.indiacode.nic.in/bitstream/123456789/13091/1/a2019-](https://www.indiacode.nic.in/bitstream/123456789/13091/1/a2019-40.pdf)  
548 [40.pdf](https://www.indiacode.nic.in/bitstream/123456789/13091/1/a2019-40.pdf)
- 549 44. Gove Government of India. The Transgender Persons (Protection of Rights) Rules, 2020.  
550 [https://thc.nic.in/Central%20Governmental%20Rules/Transgender%20Persons%20\(Pro](https://thc.nic.in/Central%20Governmental%20Rules/Transgender%20Persons%20(Protection%20of%20Rights)%20Rules,%202020.pdf)  
551 [tection%20of%20Rights\)%20Rules,%202020.pdf](https://thc.nic.in/Central%20Governmental%20Rules/Transgender%20Persons%20(Protection%20of%20Rights)%20Rules,%202020.pdf)
- 552 45. Operario D, Nemoto T. HIV in transgender communities: Syndemic dynamics and a need  
553 for multicomponent interventions. *J Acquir Immune Defic Syndr.* 2010;55(Suppl 2):S91-  
554 S93.
- 555 46. Tsai AC, Burns BF. Syndemics of psychosocial problems and HIV risk: A systematic  
556 review of empirical tests of the disease interaction concept. *Soc Sci Med.* 2015;139:26-  
557 35.
